# Supplementary material for: Biomimetic design: a programmed tetradecapeptide folds and auto-dimerizes as a stereochemically articulated receptor protein
Source: Royal Society of Chemistry journal article supplement (doi:10.1039/c5ra17350g), 2015-12-22
Supplement: c5ra17350g1.pdf [file c5ra17350g1.pdf]

## Electronic Supplementary Information

### **Biomimetic Design: A Programmed Tetradecapeptide Folds and Homodimerizes as a Stereochemically Articulated Receptor Protein**

Punam Ghosh, Deepa Pedenekar, and Susheel Durani<sup>a\*</sup>

<sup>a</sup>Department of Chemistry, Indian Institute of Technology Bombay, Mumbai-400076, India

\*CORRESPONDING AUTHOR EMAIL: [sdurani@iitb.ac.in](mailto:sdurani@iitb.ac.in)

\*CORRESPONDING AUTHOR FOOTNOTE

Dr. S. Durani (Professor),  
Department of Chemistry,  
Indian Institute of Technology Bombay,  
Mumbai-400076, India  
Email: [sdurani@iitb.ac.in](mailto:sdurani@iitb.ac.in)  
Ph: +91-22-25767164  
Fax: +91-22-25767152

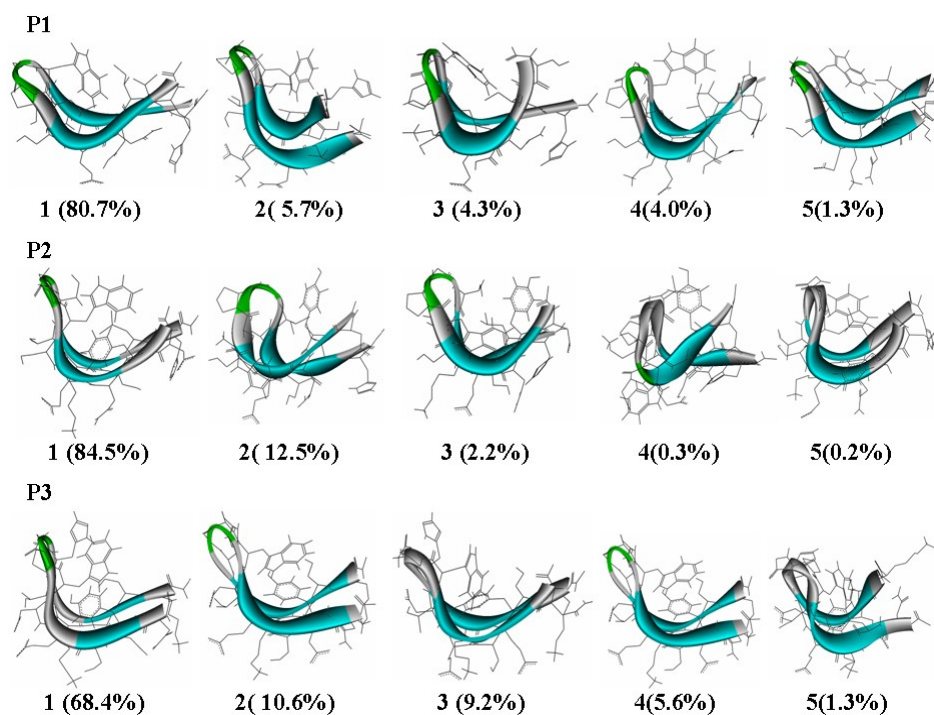

**Figure S1:** Ribbon representation of central member of the five most populous clusters of monomer fold in 50 ns-MD trajectory enumerated to 0.15 nm RMSD cut-off over  $C\alpha$  atoms of polypeptide. % Population of the ensemble in each cluster is shown in parenthesis.

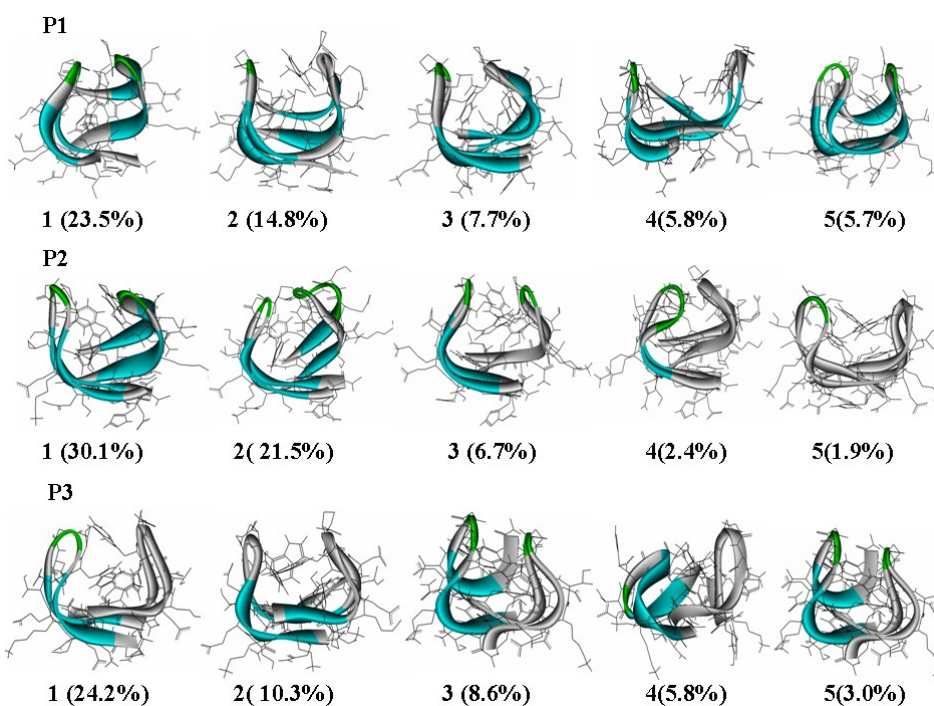

**Figure S2:** Ribbon representation of central member of the five most populous clusters of homodimer fold in 50 ns-MD trajectory enumerated to 0.15 nm RMSD cut-off over  $C\alpha$  atoms of polypeptides. % Population of the ensemble in each cluster is shown in parenthesis.

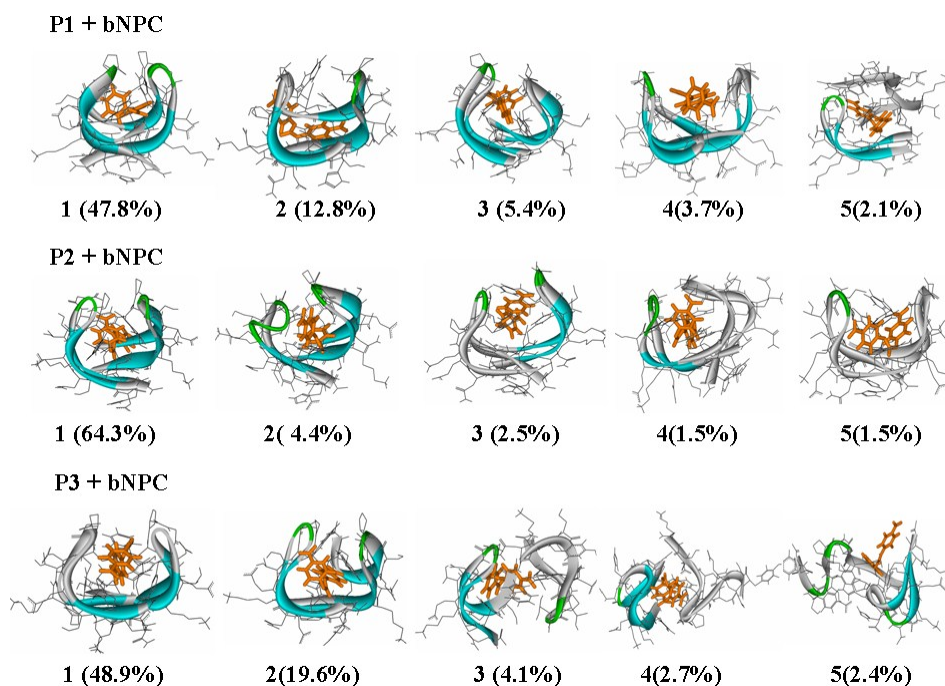

**Figure S3:** Ribbon representation of central member of the five most populous clusters of the bNPC-bound homodimer in 50 ns-MD trajectory enumerated to 0.15 nm RMSD cut-off over  $C\alpha$  atoms of the polypeptide. % Population of the ensemble in each cluster is shown in parenthesis.

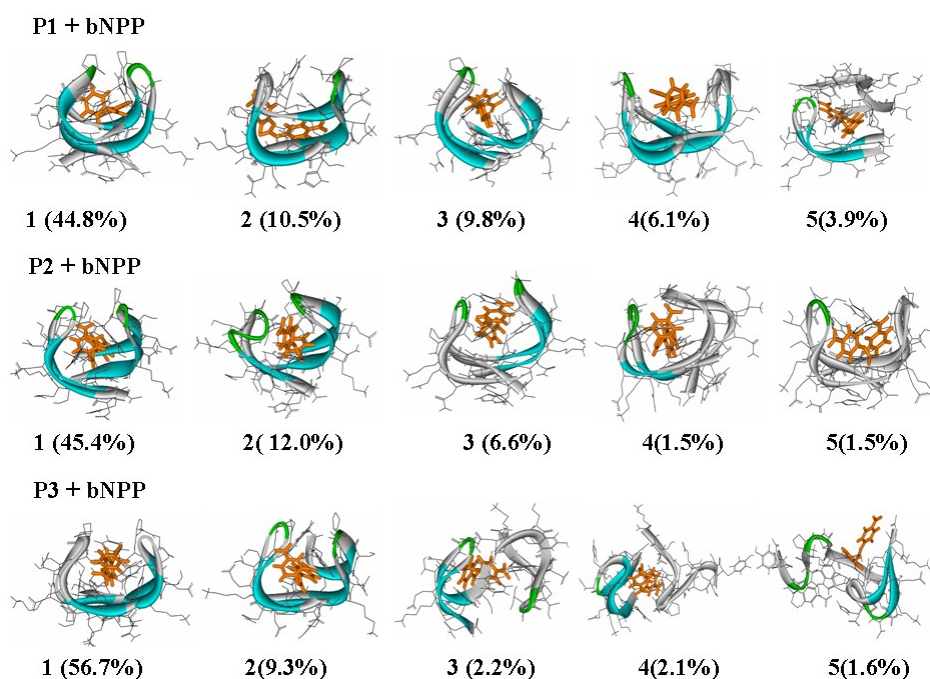

**Figure S4:** Ribbon representation of central member of the five most populous clusters of the bNPP-bound homodimer in 50 ns-MD trajectory enumerated to 0.15 nm RMSD cut-off over  $C\alpha$  atoms of polypeptides. % Population of the ensemble in each cluster is shown in parenthesis.

**P1**

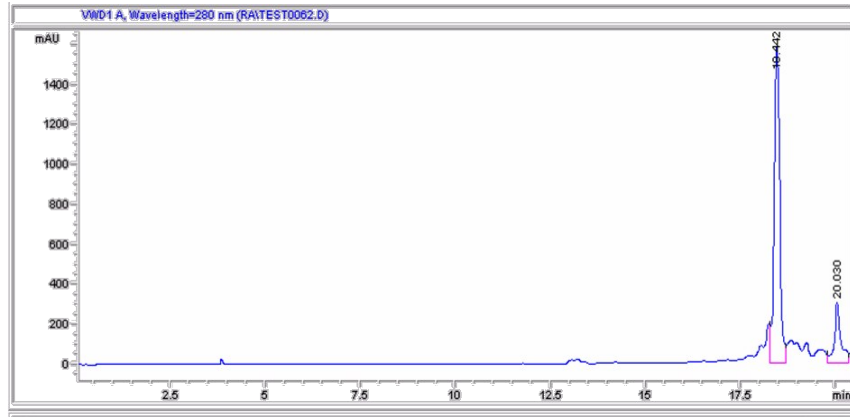

**P2**

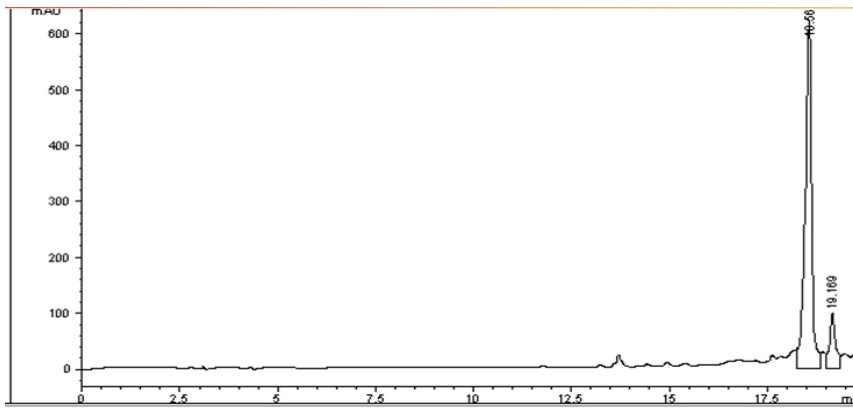

**P3**

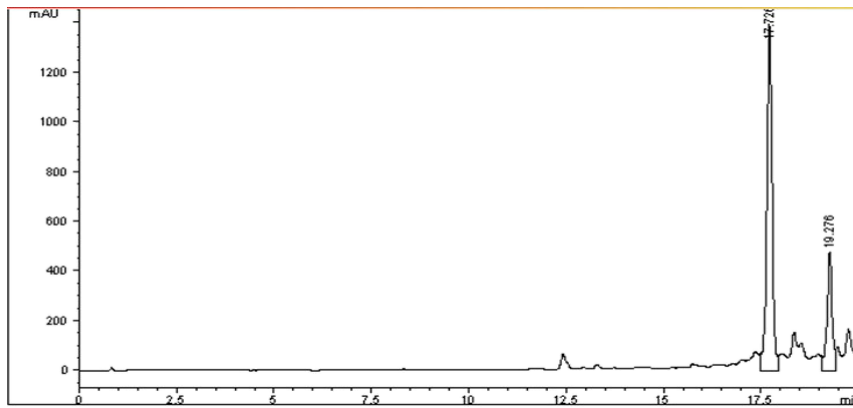

**Figure S5:** HPLC profiles showing the purity of the peptides P1, P2 and P3

**P1**

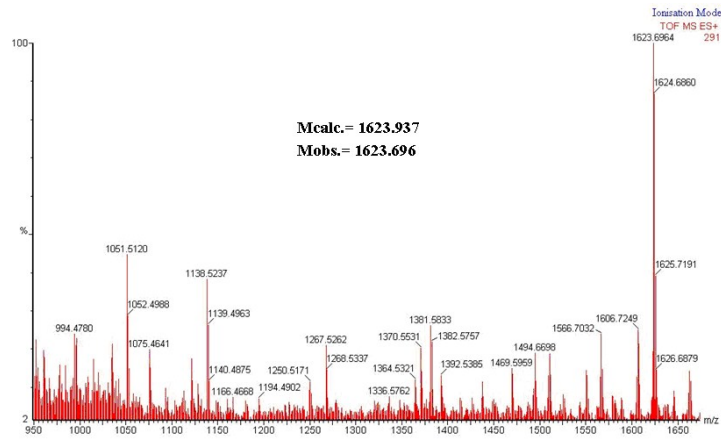

**Panel A**

**P2**

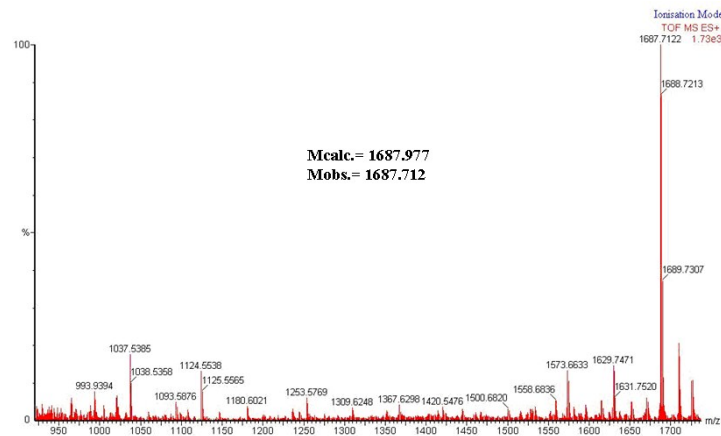

**Panel B**

**P3**

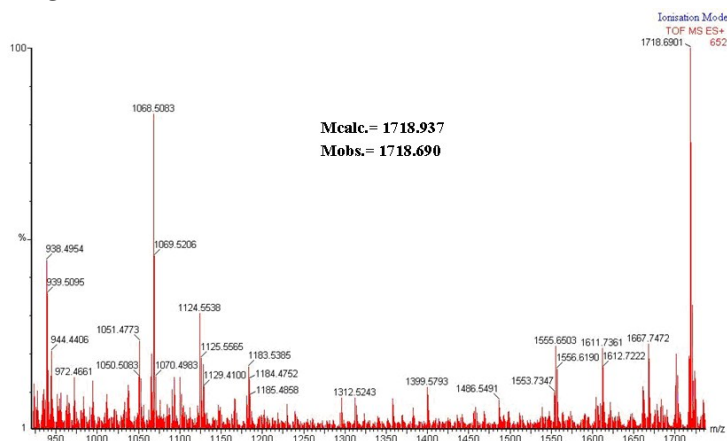

**Panel C**

**Figure S6: ESI Mass Spectra of the peptides**

**P1**

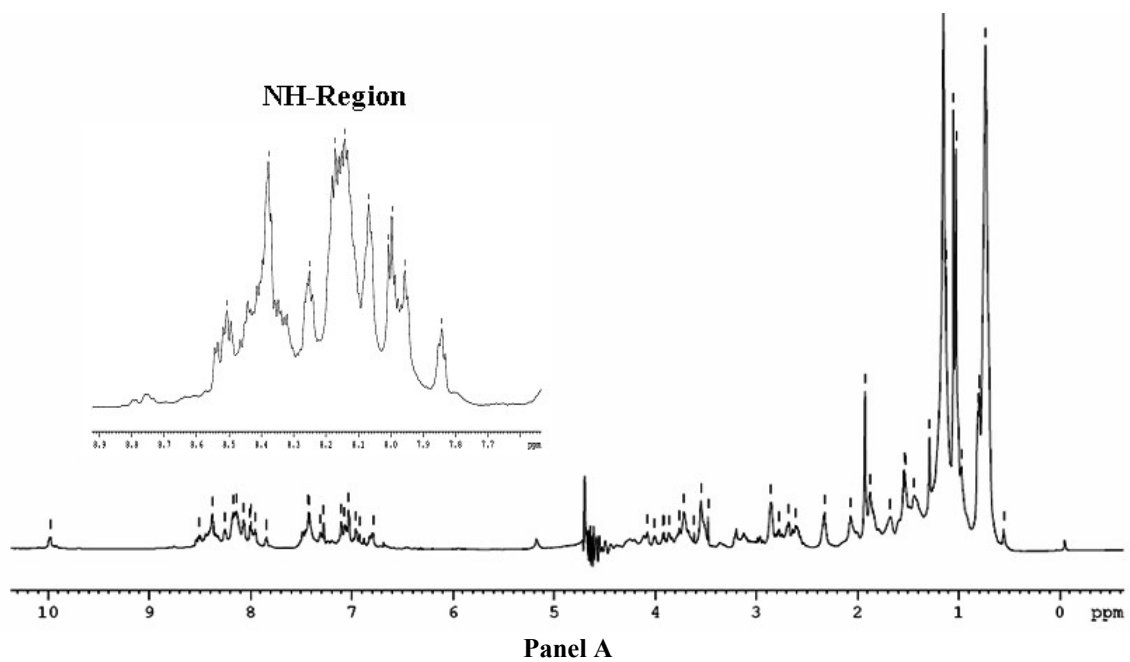

**P2**

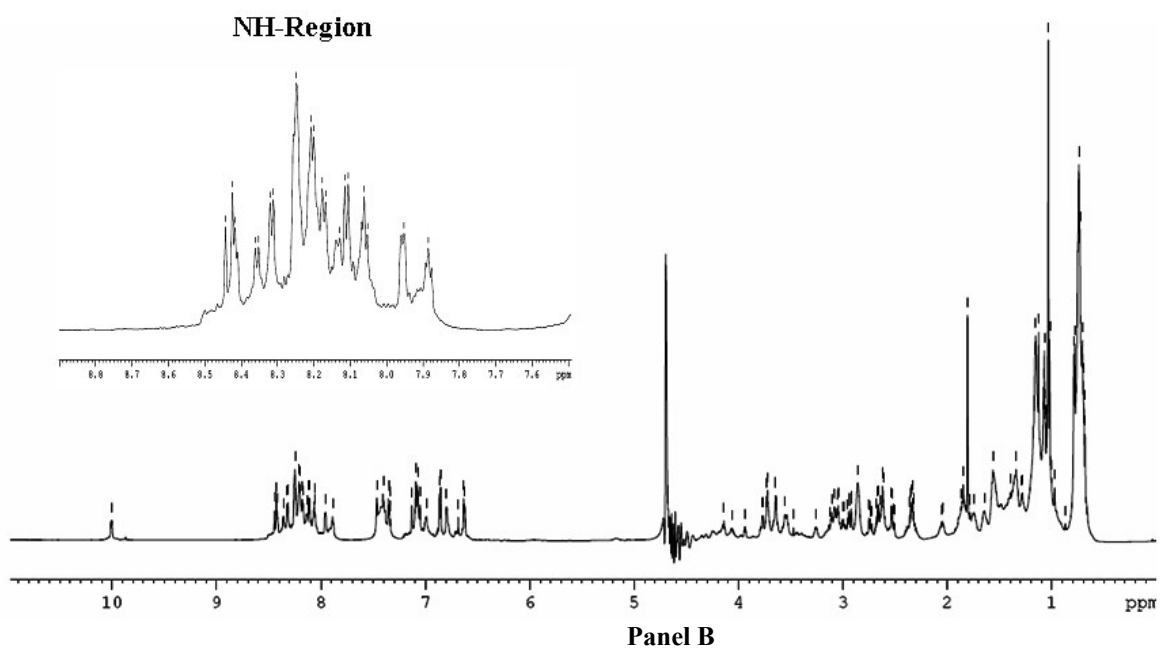



P3

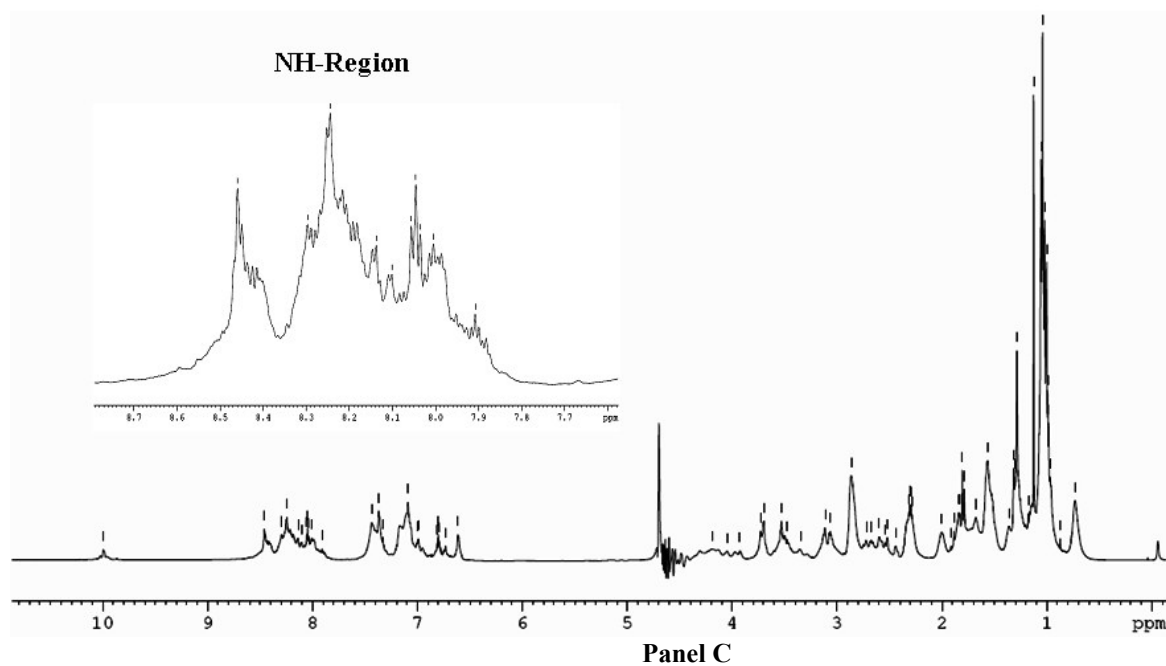

**Figure S7:** <sup>1</sup>H-NMR spectra of **P1** (Panel A) **P2** (Panel B) and **P3** (Panel C) recorded at 800 Mz in 90% D<sub>2</sub>O-H<sub>2</sub>O mixture. Expanded NH regions are shown as insets.

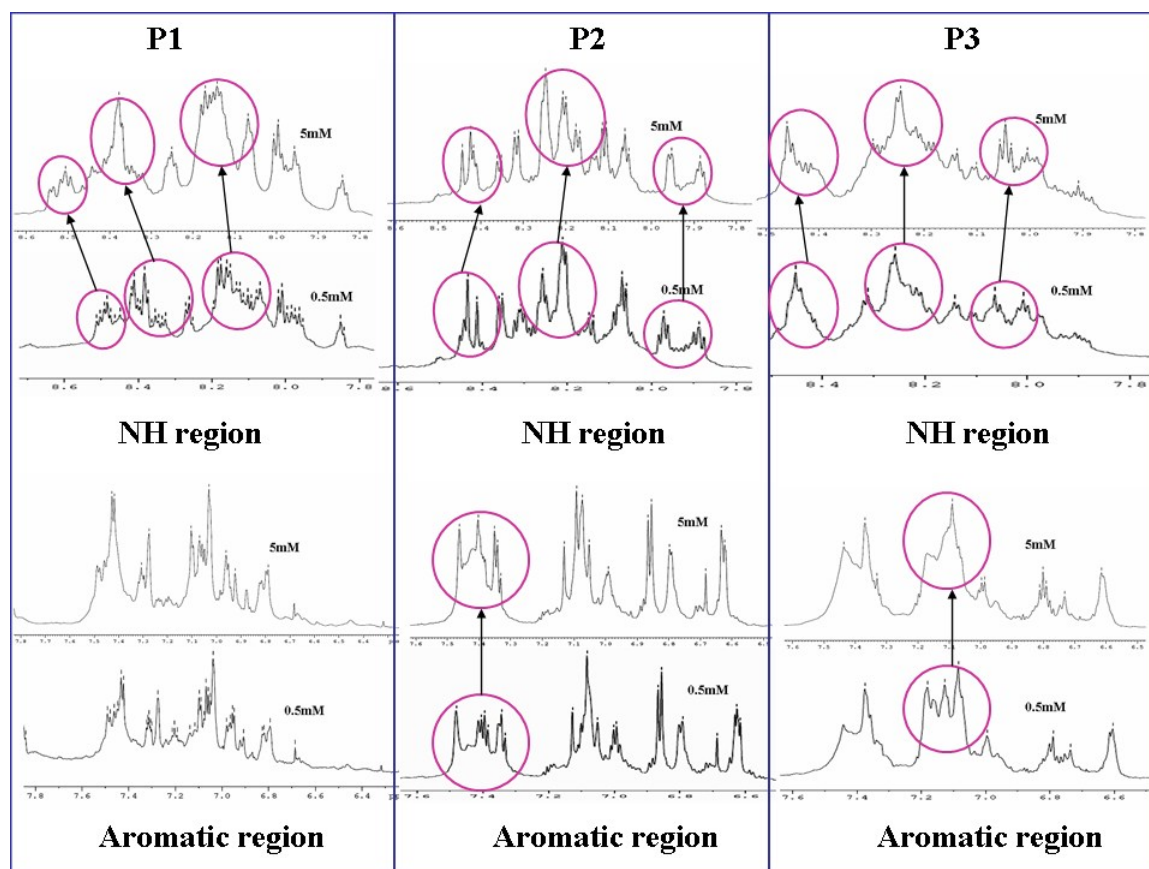

**Figure S8:** Peptide-NH and Aromatic-H regions of <sup>1</sup>H-NMR spectra recorded at 0.5 mM and 5.0 mM concentrations of the peptides in 90% D<sub>2</sub>O-H<sub>2</sub>O mixture. The specific resonances affected by dilution are highlighted with circles.

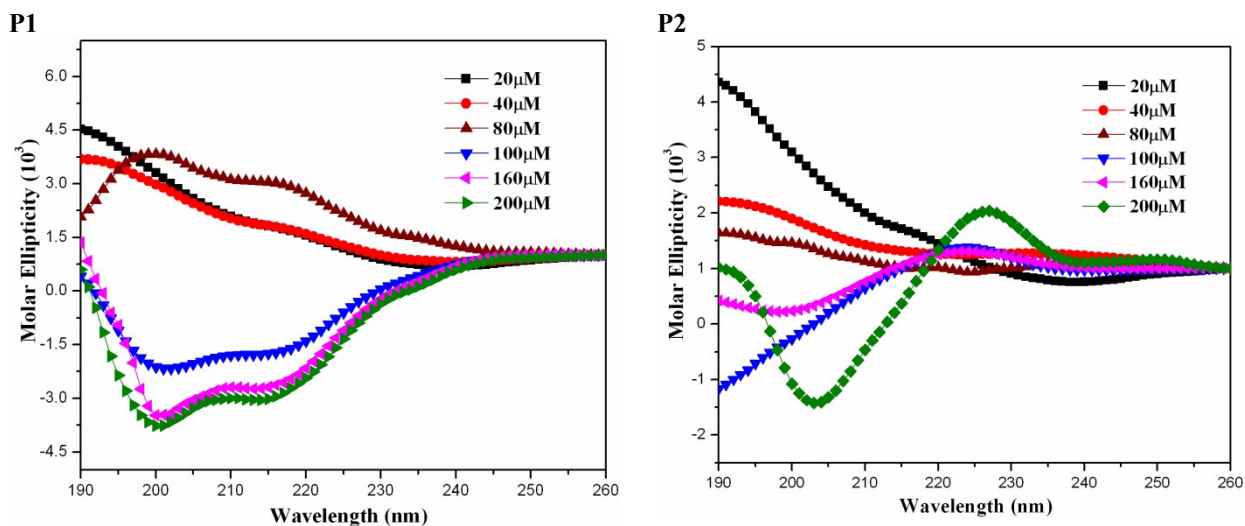

**Figure S9:** CD traces of **P1** (Left Panel) and **P2** (Right Panel) recorded in water in the concentration range 20-200  $\mu\text{M}$ .

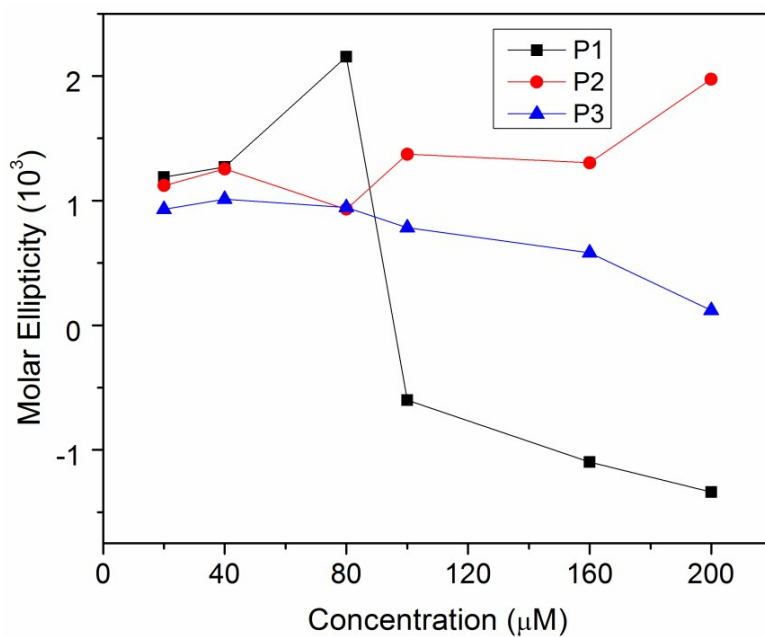

**Figure S10:** Molar ellipticity vs concentration plots for peptides **P1**, **P2** and **P3** recorded in water.

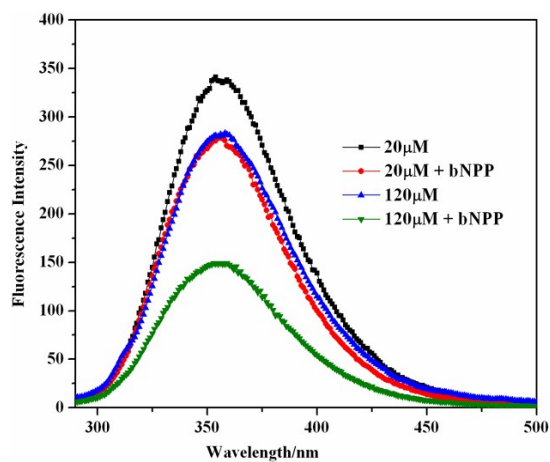



P1

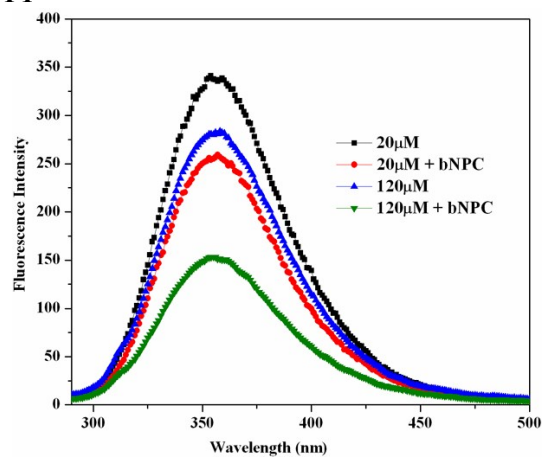

P2

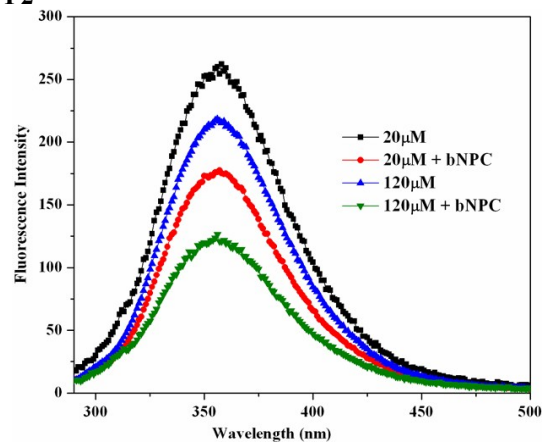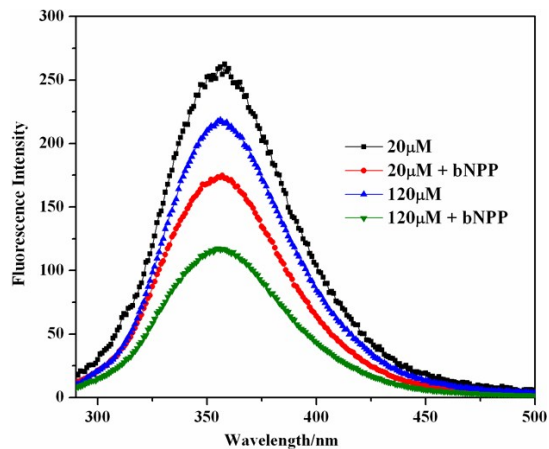

P3

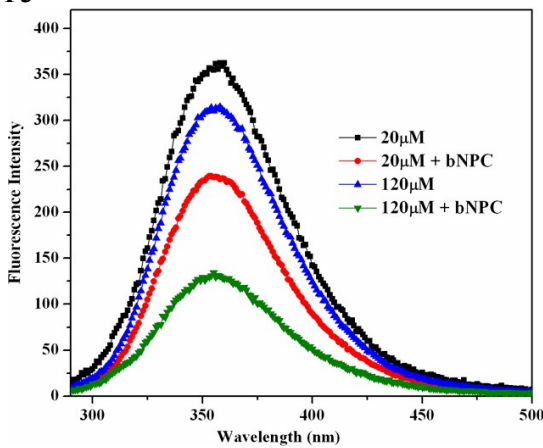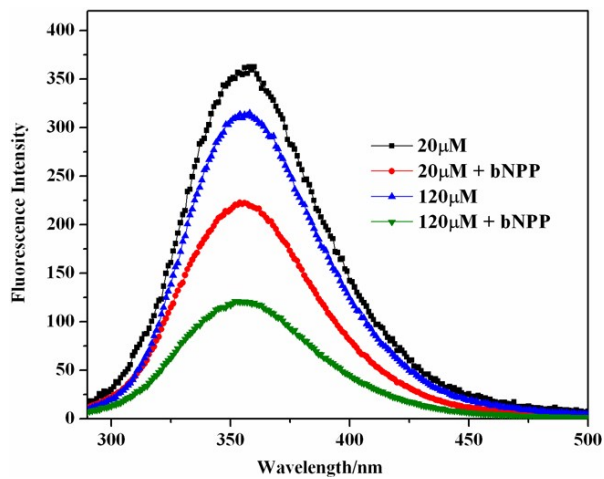

**Figure S11:** Fluorescence emission spectra at 298 K of peptides at 20 and 120  $\mu$ M concentrations in absence and presence of the ligand in 100  $\mu$ M concentration.

P1

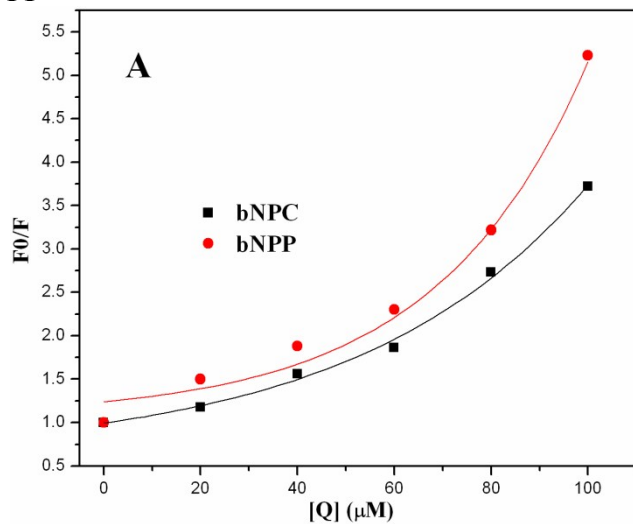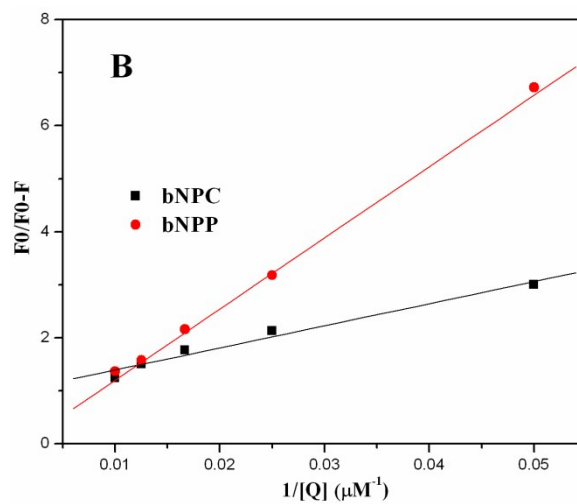

P2

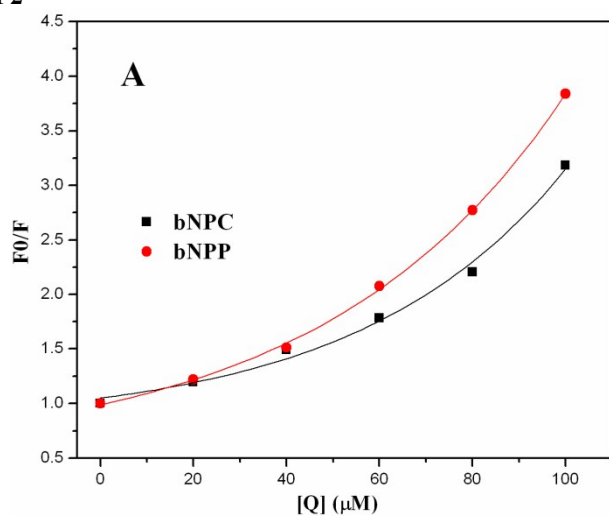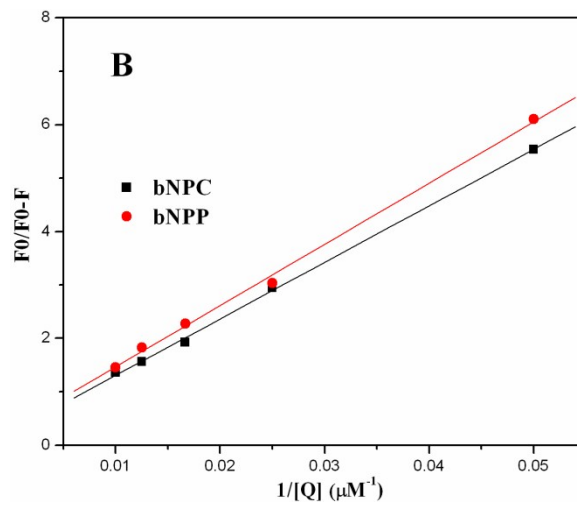

**Figure S12:** Plots of fluorescence quenching data for **P1** and **P2** at  $120\mu\text{M}$  concentration with the ligands according to Stern-Volmer equation (left panel) and modified form of the equation as given in the Materials and Methods Section (right panel).
